# Supplementary material
Source: PubMed Central journal article supplement (PMC5629445)

# Supplementary Figure 1

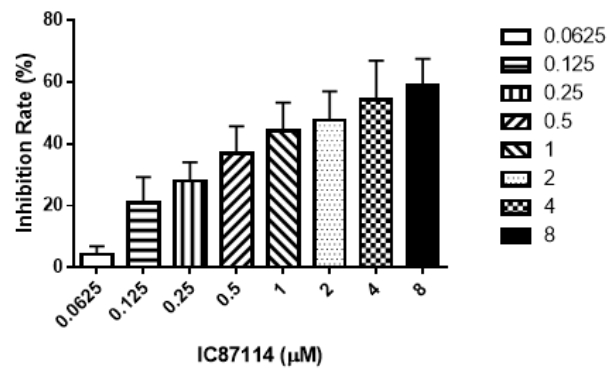

Supplement: IMM-152-507-s001.pdf [file IMM-152-507-s001.pdf]

## Supplementary Figure 2

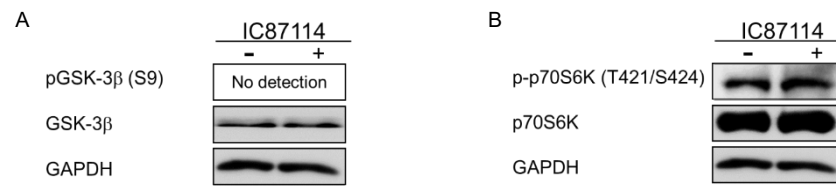

Supplement: IMM-152-507-s002.pdf [file IMM-152-507-s002.pdf]

### Supplementary Figure 3

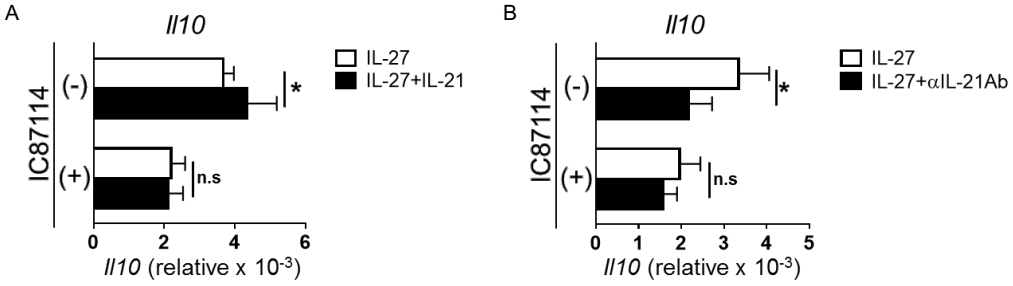

Supplement: IMM-152-507-s003.pdf [file IMM-152-507-s003.pdf]
